# Supplementary material for: Efficient ligand discovery from natural herbs by integrating virtual screening, affinity mass spectrometry and targeted metabolomics
Source: Royal Society of Chemistry journal article supplement (doi:10.1039/c8an02482k), 2019-01-01
Supplement: c8an02482k1.xlsx [file c8an02482k1.xlsx]

## Sheet: HJ
Compound ID	Formula	Mass	Adduct	RT(min)	error(ppm)	isotope difference ratio	BI-1	BI-2	BI-3	BI-4	Mean BI	p-value	MSMS Match
16384	C21H27NO3	341.199	+H	17.62	1.6	4.4	8.25204	8.8496	7.66932	8.65072	8.35542	9.72573e-05	1
16387	C16H17NO3	271.121	+H	7.54	2.9	9	1.98893	1.35098	1.80378	1.50092	1.66115	0.0194977	1
16388	C16H17NO3	271.121	+H	8.06	2.7	2.8	1.73724	1.27515	1.77881	1.54194	1.58328	0.0147859	1
17436	C20H25NO3	327.183	+H	15.84	1.6	4.2	8.45719	9.58458	7.6169	8.79608	8.61369	0.000334992	1
17437	C20H23NO3	325.168	+H	14.91	2.5	5.2	5.50645	5.82986	5.85436	6.02704	5.80443	2.54121e-05	1
17451	C17H19NO3	285.136	+H	11.26	3.2	4.5	2.14757	1.75528	2.04236	1.68413	1.90733	0.00386916	1
17469	C21H29NO3	343.215	+H	18.79	1.6	5.7	7.7694	9.68202	8.14384	9.18369	8.69474	0.000420743	1
3408	C18H11NO4	305.069	+H	7.96	-1	2.7	18.5439	15.4238	12.4058	17.9684	16.0855	0.00171455	1
11272	C16H29NO	251.225	+H	20.08	2.5	5.2	9.51813	8.08693	9.19896	7.46907	8.56827	0.000547164	1
17435	C20H27NO3	329.199	+H	16.4	1.3	5.6	6.64151	7.28097	6.35083	6.51624	6.69738	9.99328e-05	1
17441	C23H31NO3	369.23	+H	21.63	0.8	5.3	75.6618	48.9931	71.5321	48.3654	61.1381	0.0036613	1
8841 (GC-7)	C30H46O4	470.34	+H	19.08	0.7	6.3	3.40393	2.83329	3.18256	2.60283	3.00565	0.00150876	1

## Sheet: DS
Compound ID	Formula	Mass	Adduct	RT(min)	error(ppm)	isotope difference ratio	BI-1	BI-2	BI-3	BI-4	mean BI	p-value	MSMS Match
4635	C21H20O4	336.136	+H	22.64	-8.6	12.9	2.8076	2.43555	2.53708	2.58	2.59006	0.000263893	0.673
4950	C19H20O2	280.146	+H	25.87	0.3	8.8	7.19999	7.04157	6.58439	6.84	6.91649	2.49869e-05	0.563
19218	C18H20O2	268.146	+H	26.46	0	9.6	22.7703	16.8962	16.4503	18.42	18.6342	0.00117686	0.784
4633	C18H16O3	280.11	+H	23.37	-2.6	9.2	18.842	12.6648	12.63	15.03	14.7917	0.00252575	0.608
11629	C18H16O2	264.115	+H	25.14	0.3	8.8	8.82752	8.58541	9.59638	9.22	9.05733	4.61351e-05	0.591
14736	C20H18O5	338.115	+H	23.98	-0.3	5.7	10.8563	7.58855	8.57814	9.18	9.05074	0.00132636	0.807
15801	C17H12O4	280.074	+H	20.6	0.6	7.1	10.0188	6.91291	7.58201	7.97	8.12094	0.00177403	0.602
21080	C18H16O3	280.11	+H	23.72	1.2	2.6	12.0445	9.62842	9.77717	10.11	10.39	0.000463331	0.537
4629	C17H16O3	268.11	+H	24.25	0.1	9.3	12.7261	9.84449	9.70267	10.32	10.6483	0.000844305	0.71
8841 (GC-7)	C30H46O4	470.34	+H	25.59	-1	4.9	2.36219	2.32306	2.18916	2.45	2.3311	0.0001484	0.552

## Sheet: MD
Compound ID	Formula	Mass	Adduct	RT(min)	error(ppm)	isotope difference ratio	S/C-1	S/C-2	S/C-3	S/C-4	AVERAGE	p-value	MSMS Match
14635	C19H18O6	342.11	+H	23.99	0.6	4.2	3.89838	3.30863	3.40695	3.26259	3.46914	0.000452201	1
14636	C19H20O5	328.131	+H	24.24	0.5	0.2	3.96396	3.31661	3.2007	3.65311	3.5336	0.00068549	1
16139	C20H18O7	370.105	+H	24.6	-0.6	1.8	12.2552	11.0528	10.0689	9.4974	10.7186	0.000523599	1
21722	C19H18O7	358.105	+H	21.24	-0.9	2.3	2.87964	2.26339	2.58565	2.17026	2.47473	0.0027842	1
16138	C19H16O7	356.09	+H	25.56	0.6	1.6	12.3859	11.8607	8.50923	9.53689	10.5732	0.0019273	1
11577	C18H16O6	328.095	+H	23.12	-1.2	5.2	3.76083	2.9638	2.63351	2.93425	3.0731	0.00330636	1
875	C19H14O7	354.074	+H	25.42	0.5	3.5	15.4018	14.7196	11.9311	12.4039	13.6141	0.000669029	1
16149	C19H14O7	354.074	+H	25.68	-1	1.5	9.16	8.33744	10.5258	14.503	10.6315	0.00587686	1
19072	C44H70O16	854.466	+H	22.6	0.8	2.4	11.4119	11.5442	16.5556	14.071	13.3957	0.00202213	1
8841 (GC-7)	C30H46O4	470.34	+H	25.65	0.8	5.3	2.39307	2.03198	2.72282	2.75367	2.47539	0.00315518	0.83

## Sheet: HFT
Compound ID	Formula	Mass	Adduct	RT(min)	error(ppm)	isotope difference ratio	BI-1	BI-2	BI-3	BI-4	Mean BI	p-value	MSMS Match
3517	C20H22O5	342.147	+H	9.21	-0.9	1.5	0.995152	1.05636	1.08388	1.04317	1.04464	0.0952939	0.892
13293	C20H22O5	342.147	+H	12.57	-0.7	1.4	1.17025	1.01236	1.34924	1.33549	1.21683	0.0718201	0.697
8036	C20H20O5	340.131	+H	12.12	0.2	3.4	1.67642	1.68062	1.38331	1.44928	1.54741	0.0057033	0.918
8086	C20H20O5	340.131	+H	13.59	1.1	4.4	1.56832	1.49804	1.49567	1.41293	1.49374	0.000579119	0.753
23030	C20H20O5	340.131	+H	25.02	7	1.4	1.33048	1.29003	0.986756	1.07235	1.1699	0.134106	0.533
13295	C20H20O5	340.131	+H	14.13	0.8	2.8	1.29868	1.10109	1.18093	1.63902	1.30493	0.0823001	0.768
8038	C21H24O5	356.162	+H	12.05	1.5	4.3	1.33773	1.34197	1.27825	1.37752	1.33387	0.000509049	0.78
8039	C21H24O5	356.162	+H	21.76	0.9	4	1.72684	1.8305	1.0071	1.34281	1.47681	0.0854176	0.823
8841 (GC-7)	C30H46O4	470.34	+H	25.29	0.5	5.6	2.34565	2.29961	2.47618	2.89563	2.50427	0.00157299	0.824
